# Supplementary material
Source: MDPI journal article supplement (https://www.mdpi.com/2075-163X/12/5/658)
Supplement: s1 [file s1]

**Table S1.** Major, trace and rare earth concentrations of the whole-rock samples collected from the Yuejin--II area.

| Sample number                  | ZKII-05-53 | ZKII-05-15 | ZKII-05-16     | ZKII-05-16     | ZKII-05-18 | ZKII-05-22     | ZKII-05-24     | ZKII-05-25 | ZKII-05-26 | ZKII-05-26 | ZKII-05-27 | ZKII-05-27 | ZKII-05-28 | ZKII-05-29     | ZKII-05-30 | ZKII-05-30 | ZKII-05-31 | ZKII-05-31     | ZKII-05-33 | ZKII-05-33 | ZKII-05-34 | ZKII-05-35 | ZKII-05-35 | ZKII-05-36 | ZKII-05-39 | ZKII-05-40 | ZKII-05-41     | ZKII-05-42 | ZKII-05-43 | ZKII-05-44 | ZKII-05-45 |
|--------------------------------|------------|------------|----------------|----------------|------------|----------------|----------------|------------|------------|------------|------------|------------|------------|----------------|------------|------------|------------|----------------|------------|------------|------------|------------|------------|------------|------------|------------|----------------|------------|------------|------------|------------|
|                                |            | 1.5        | 5.5            | 8              | 8.5        | 3              | 3              | 1          | 2.6        | 7.5        | 3.5        | 8.1        | 6          | 6              | 2          | 6          | 3          | 8.5            | 0          | 6          | 4          | 2.5        | 6.5        | 3          | 4.5        | 6          | 8              | 5          | 5          | 7          | 4.5        |
| Rock type                      | Mudstone   | Siltstone  | Silty mudstone | Silty mudstone | Mudstone   | Silty mudstone | Silty mudstone | Mudstone   | Mudstone   | Mudstone   | Mudstone   | Siltstone  | Mudstone   | Silty mudstone | Mudstone   | Mudstone   | Mudstone   | Silty mudstone | Mudstone   | Mudstone   | Mudstone   | Mudstone   | Mudstone   | Mudstone   | Mudstone   | Mudstone   | Silty mudstone | Mudstone   | Mudstone   | Mudstone   | Mudstone   |
| Major elements (wt.%)          |            |            |                |                |            |                |                |            |            |            |            |            |            |                |            |            |            |                |            |            |            |            |            |            |            |            |                |            |            |            |            |
| SiO <sub>2</sub> (wt%)         | 42.84      | 54.44      | 48.53          | 48.18          | 54.13      | 40.27          | 50.04          | 57.68      | 71.22      | 63.16      | 53.50      | 39.87      | 55.56      | 55.52          | 51.26      | 49.78      | 58.19      | 37.64          | 59.22      | 49.98      | 56.16      | 59.82      | 51.00      | 58.80      | 57.46      | 65.04      | 60.47          | 42.93      | 55.63      | 53.59      | 55.28      |
| TiO <sub>2</sub>               | 0.53       | 0.62       | 0.58           | 0.50           | 0.65       | 0.48           | 0.58           | 0.67       | 0.41       | 0.74       | 0.67       | 0.23       | 0.63       | 0.66           | 0.62       | 0.62       | 0.60       | 0.36           | 0.70       | 0.58       | 0.72       | 0.69       | 0.60       | 0.66       | 0.68       | 0.78       | 0.73           | 0.57       | 0.67       | 0.63       | 0.67       |
| Al <sub>2</sub> O <sub>3</sub> | 11.02      | 12.96      | 10.82          | 9.75           | 12.78      | 8.78           | 10.73          | 11.96      | 13.23      | 13.63      | 12.33      | 7.71       | 11.73      | 12.13          | 11.32      | 11.19      | 10.85      | 7.60           | 12.46      | 10.51      | 13.08      | 12.34      | 10.86      | 12.78      | 12.29      | 14.31      | 12.89          | 10.45      | 11.70      | 10.96      | 12.02      |
| Fe <sub>2</sub> O <sub>3</sub> | 2.80       | 4.47       | 2.69           | 1.94           | 2.79       | 2.43           | 3.51           | 2.65       | 1.32       | 3.71       | 2.91       | 1.05       | 2.79       | 2.36           | 2.94       | 2.29       | 2.53       | 1.84           | 3.72       | 1.77       | 2.70       | 3.04       | 3.08       | 3.92       | 2.82       | 4.12       | 3.29           | 2.67       | 2.50       | 2.52       | 2.34       |
| FeO                            | 1.81       | 1.64       | 1.63           | 1.48           | 1.92       | 1.24           | 1.31           | 1.89       | 0.83       | 1.85       | 2.00       | 0.60       | 1.63       | 2.02           | 1.90       | 1.86       | 1.51       | 0.68           | 1.55       | 2.73       | 1.74       | 1.61       | 1.58       | 1.34       | 1.56       | 1.48       | 1.66           | 2.24       | 1.96       | 1.77       | 2.23       |
| MnO                            | 0.10       | 0.06       | 0.08           | 0.09           | 0.08       | 0.23           | 0.11           | 0.06       | 0.03       | 0.06       | 0.09       | 0.10       | 0.07       | 0.07           | 0.08       | 0.17       | 0.08       | 0.48           | 0.08       | 0.15       | 0.07       | 0.07       | 0.24       | 0.06       | 0.08       | 0.05       | 0.06           | 0.20       | 0.08       | 0.09       | 0.09       |
| MgO                            | 2.88       | 2.78       | 2.80           | 2.27           | 2.86       | 2.10           | 2.65           | 2.85       | 1.24       | 2.95       | 2.21       | 1.09       | 2.39       | 2.88           | 4.24       | 3.15       | 2.81       | 1.59           | 2.39       | 1.98       | 2.29       | 2.11       | 1.94       | 2.20       | 1.97       | 2.74       | 2.47           | 7.74       | 2.53       | 4.03       | 2.58       |
| CaO                            | 17.13      | 8.11       | 14.12          | 16.85          | 9.52       | 22.06          | 14.02          | 7.35       | 1.80       | 2.10       | 11.68      | 25.58      | 10.28      | 8.64           | 8.88       | 12.47      | 7.96       | 24.79          | 6.61       | 13.39      | 8.20       | 7.12       | 14.48      | 7.00       | 9.00       | 1.10       | 5.62           | 11.72      | 9.45       | 9.58       | 8.27       |
| Na <sub>2</sub> O              | 1.66       | 2.04       | 1.95           | 1.94           | 2.24       | 1.83           | 2.08           | 2.69       | 3.95       | 2.99       | 2.16       | 1.96       | 2.34       | 2.46           | 2.60       | 2.29       | 2.50       | 1.61           | 2.20       | 2.15       | 2.60       | 2.27       | 1.89       | 2.20       | 2.61       | 2.42       | 2.28           | 1.63       | 2.07       | 2.15       | 2.54       |
| K <sub>2</sub> O               | 2.38       | 2.92       | 2.39           | 2.20           | 2.86       | 1.90           | 2.27           | 2.54       | 3.18       | 2.91       | 2.58       | 1.90       | 2.46       | 2.52           | 2.34       | 2.30       | 2.29       | 1.68           | 2.57       | 2.19       | 2.70       | 2.60       | 2.27       | 2.74       | 2.63       | 2.98       | 2.71           | 2.20       | 2.41       | 2.29       | 2.48       |
| P <sub>2</sub> O <sub>5</sub>  | 0.12       | 0.15       | 0.13           | 0.13           | 0.15       | 0.13           | 0.15           | 0.17       | 0.10       | 0.18       | 0.16       | 0.08       | 0.16       | 0.16           | 0.15       | 0.15       | 0.14       | 0.10           | 0.17       | 0.15       | 0.17       | 0.17       | 0.15       | 0.16       | 0.17       | 0.17       | 0.17           | 0.13       | 0.16       | 0.14       | 0.16       |
| LOI                            | 16.53      | 9.63       | 14.10          | 14.51          | 9.80       | 18.42          | 12.41          | 9.30       | 2.59       | 5.51       | 9.48       | 19.77      | 9.77       | 10.36          | 13.42      | 13.54      | 10.37      | 21.56          | 8.16       | 14.10      | 9.38       | 7.98       | 11.74      | 7.98       | 8.57       | 4.65       | 7.46           | 17.28      | 10.62      | 12.04      | 11.10      |
| Total                          | 99.80      | 99.82      | 99.82          | 99.84          | 99.78      | 99.87          | 99.86          | 99.81      | 99.90      | 99.79      | 99.77      | 99.94      | 99.81      | 99.78          | 99.75      | 99.81      | 99.83      | 99.93          | 99.83      | 99.68      | 99.81      | 99.82      | 99.83      | 99.84      | 99.84      | 99.84      | 99.84          | 99.76      | 99.78      | 99.79      | 99.76      |
| Mg#                            | 75.92      | 77.05      | 77.29          | 75.24          | 74.69      | 77.04          | 80.03          | 74.92      | 74.74      | 75.95      | 68.64      | 78.25      | 74.39      | 73.85          | 81.55      | 77.04      | 78.66      | 82.24          | 75.34      | 58.96      | 72.28      | 72.19      | 70.86      | 76.48      | 71.44      | 78.57      | 74.67          | 87.25      | 71.89      | 81.85      | 69.62      |
| Trace elements (ppm)           |            |            |                |                |            |                |                |            |            |            |            |            |            |                |            |            |            |                |            |            |            |            |            |            |            |            |                |            |            |            |            |
| Sc                             | 11.80      | 13.70      | 11.70          | 10.30          | 14.00      | 10.20          | 12.40          | 12.60      | 6.63       | 15.10      | 13.60      | 5.59       | 12.30      | 13.00          | 12.80      | 14.30      | 11.10      | 8.74           | 14.00      | 13.00      | 15.00      | 12.50      | 12.40      | 13.20      | 12.60      | 15.20      | 13.80          | 16.20      | 13.70      | 13.40      | 13.60      |
| V                              | 78.10      | 98.20      | 70.80          | 58.80          | 98.00      | 61.20          | 93.90          | 83.10      | 95.20      | 162.00     | 85.10      | 26.20      | 76.90      | 88.50          | 78.80      | 77.50      | 77.20      | 50.10          | 86.60      | 71.10      | 92.30      | 80.10      | 72.30      | 96.40      | 79.20      | 110.00     | 99.60          | 125.00     | 87.20      | 84.10      | 90.40      |
| Cr                             | 60.60      | 76.10      | 60.90          | 51.20          | 71.00      | 49.60          | 67.30          | 69.90      | 66.10      | 145.00     | 67.40      | 23.20      | 61.80      | 69.80          | 66.00      | 64.50      | 82.90      | 52.80          | 73.30      | 58.10      | 81.30      | 68.20      | 67.80      | 70.60      | 59.50      | 132.00     | 129.00         | 74.90      | 65.80      | 66.10      | 65.80      |
| Co                             | 13.00      | 21.80      | 12.80          | 11.20          | 14.00      | 15.90          | 12.50          | 12.30      | 5.53       | 15.00      | 14.00      | 6.95       | 12.50      | 14.60          | 12.80      | 13.40      | 10.10      | 12.10          | 11.90      | 11.00      | 12.70      | 10.60      | 12.00      | 11.00      | 9.92       | 14.20      | 13.40          | 13.80      | 14.00      | 13.00      | 12.80      |
| Ni                             | 32.60      | 56.50      | 32.90          | 27.30          | 37.00      | 32.20          | 32.00          | 33.00      | 14.20      | 41.20      | 37.00      | 15.70      | 31.80      | 35.60          | 34.20      | 33.10      | 28.60      | 24.50          | 36.30      | 30.00      | 33.30      | 30.10      | 32.70      | 31.00      | 26.50      | 41.10      | 36.20          | 34.90      | 33.30      | 31.20      | 32.10      |
| Cu                             | 25.70      | 33.70      | 22.50          | 17.40          | 30.10      | 18.80          | 25.10          | 27.90      | 12.70      | 29.30      | 27.70      | 9.59       | 24.60      | 27.40          | 27.80      | 23.50      | 25.70      | 33.60          | 24.00      | 20.50      | 28.40      | 29.00      | 23.90      | 26.80      | 26.20      | 31.80      | 27.40          | 26.20      | 25.80      | 25.80      | 29.40      |
| Zn                             | 72.30      | 98.80      | 69.40          | 56.60          | 80.60      | 57.80          | 65.70          | 74.10      | 35.20      | 89.30      | 77.30      | 23.50      | 69.80      | 76.00          | 76.20      | 71.70      | 59.30      | 39.30          | 79.00      | 67.20      | 82.90      | 93.70      | 66.90      | 74.20      | 67.70      | 86.50      | 79.20          | 69.80      | 73.40      | 67.00      | 77.00      |

|                                                      |            |        |        |            |        |            |            |            |        |             |        |             |            |            |            |            |            |        |            |            |            |        |        |            |             |             |            |            |            |             |             |
|------------------------------------------------------|------------|--------|--------|------------|--------|------------|------------|------------|--------|-------------|--------|-------------|------------|------------|------------|------------|------------|--------|------------|------------|------------|--------|--------|------------|-------------|-------------|------------|------------|------------|-------------|-------------|
| Ga                                                   | 14.80      | 17.00  | 14.20  | 12.30      | 17.10  | 11.20      | 13.90      | 14.90      | 14.60  | 18.50       | 15.80  | 8.76        | 14.60      | 15.70      | 15.10      | 14.50      | 13.90      | 9.97   | 16.20      | 13.60      | 16.60      | 15.70  | 13.70  | 16.40      | 15.50       | 18.50       | 16.50      | 14.00      | 15.10      | 13.60       | 15.40       |
| Rb                                                   | 98.60      | 115.00 | 94.40  | 84.40      | 110.00 | 72.90      | 88.40      | 96.30      | 108.00 | 122.00      | 102.00 | 73.90       | 95.20      | 100.0<br>0 | 98.70      | 90.80      | 91.90      | 69.70  | 104.0<br>0 | 88.90      | 105.0<br>0 | 103.00 | 88.90  | 111.0<br>0 | 103.00      | 108.0<br>0  | 109.0<br>0 | 87.40      | 94.50      | 85.60       | 97.50       |
| Sr                                                   | 470.0<br>0 | 245.00 | 303.00 | 331.0<br>0 | 226.00 | 267.0<br>0 | 274.0<br>0 | 295.0<br>0 | 236.00 | 240.00      | 312.00 | 518.00      | 364.0<br>0 | 283.0<br>0 | 444.0<br>0 | 405.0<br>0 | 327.0<br>0 | 351.00 | 272.0<br>0 | 274.0<br>0 | 268.0<br>0 | 246.00 | 291.00 | 265.0<br>0 | 288.00      | 204.0<br>0  | 235.0<br>0 | 641.0<br>0 | 284.0<br>0 | 356.0<br>0  | 284.00      |
| Y                                                    | 21.70      | 34.60  | 24.00  | 23.00      | 27.40  | 22.60      | 28.60      | 27.50      | 23.20  | 33.50       | 28.10  | 14.50       | 25.00      | 26.60      | 25.40      | 27.40      | 24.60      | 25.60  | 28.30      | 28.60      | 29.80      | 25.20  | 29.30  | 27.70      | 25.20       | 27.30       | 26.70      | 39.00      | 26.70      | 28.20       | 27.60       |
| Zr                                                   | 124.0<br>0 | 153.00 | 171.00 | 153.0<br>0 | 184.00 | 145.0<br>0 | 168.0<br>0 | 233.0<br>0 | 184.00 | 245.00      | 192.00 | 74.20       | 209.0<br>0 | 199.0<br>0 | 184.0<br>0 | 177.0<br>0 | 189.0<br>0 | 148.00 | 224.0<br>0 | 213.0<br>0 | 220.0<br>0 | 220.00 | 197.00 | 222.0<br>0 | 249.00      | 249.0<br>0  | 254.0<br>0 | 184.0<br>0 | 211.0<br>0 | 216.0<br>0  | 193.00      |
| Nb                                                   | 12.50      | 14.40  | 13.50  | 11.70      | 15.40  | 11.20      | 12.90      | 15.20      | 11.60  | 18.20       | 14.80  | 5.61        | 14.00      | 15.00      | 14.30      | 13.90      | 13.00      | 9.20   | 16.00      | 13.30      | 16.20      | 15.40  | 14.00  | 15.40      | 15.50       | 17.20       | 16.70      | 13.30      | 14.70      | 13.70       | 14.60       |
| Ba                                                   | 463.0<br>0 | 461.00 | 445.00 | 421.0<br>0 | 567.00 | 1320.00    | 751.0<br>0 | 4270.00    | 863.00 | 2350.0<br>0 | 656.00 | 1120.0<br>0 | 620.0<br>0 | 446.0<br>0 | 691.0<br>0 | 462.0<br>0 | 471.0<br>0 | 498.00 | 452.0<br>0 | 475.0<br>0 | 567.0<br>0 | 520.00 | 404.00 | 472.0<br>0 | 3390.0<br>0 | 1620.0<br>0 | 438.0<br>0 | 444.0<br>0 | 740.0<br>0 | 1680.0<br>0 | 5140.0<br>0 |
| Hf                                                   | 3.31       | 3.81   | 4.09   | 3.61       | 4.38   | 3.40       | 3.94       | 5.52       | 4.33   | 5.77        | 4.53   | 1.70        | 4.95       | 4.68       | 4.32       | 4.13       | 4.45       | 3.30   | 5.28       | 4.97       | 5.38       | 5.18   | 4.59   | 5.26       | 5.81        | 5.82        | 6.26       | 4.21       | 4.94       | 5.33        | 4.58        |
| Ta                                                   | 0.80       | 0.88   | 0.81   | 0.72       | 0.90   | 0.65       | 0.83       | 0.89       | 0.85   | 1.12        | 0.90   | 0.37        | 0.84       | 0.86       | 0.84       | 0.78       | 0.76       | 0.56   | 0.94       | 0.77       | 0.92       | 0.89   | 0.82   | 0.90       | 0.94        | 0.99        | 1.04       | 0.78       | 0.86       | 0.82        | 0.85        |
| Pb                                                   | 20.30      | 20.10  | 16.40  | 14.40      | 18.50  | 16.80      | 19.70      | 16.30      | 19.10  | 21.20       | 17.80  | 11.50       | 16.10      | 16.30      | 17.30      | 17.00      | 13.10      | 12.40  | 19.60      | 17.10      | 18.00      | 15.00  | 16.60  | 16.20      | 15.20       | 19.70       | 18.80      | 18.20      | 17.90      | 16.20       | 19.30       |
| Th                                                   | 11.20      | 11.30  | 10.30  | 8.59       | 11.40  | 7.84       | 9.04       | 10.70      | 7.82   | 14.80       | 10.70  | 4.13        | 9.79       | 10.10      | 9.72       | 9.67       | 8.81       | 6.88   | 11.40      | 9.75       | 11.30      | 10.30  | 9.56   | 11.40      | 11.60       | 11.70       | 13.20      | 9.85       | 10.20      | 9.33        | 10.50       |
| U                                                    | 17.80      | 3.44   | 2.33   | 4.41       | 2.18   | 46.00      | 11.00      | 3.16       | 7.90   | 309.00      | 5.98   | 34.90       | 48.50      | 5.96       | 2.27       | 3.74       | 1.88       | 4.09   | 1.82       | 1.60       | 53.70      | 1.74   | 1.75   | 1.83       | 7.51        | 7.19        | 2.74       | 35.50      | 2.67       | 2.27        | 10.20       |
| La                                                   | 29.80      | 44.60  | 29.80  | 28.20      | 33.40  | 27.30      | 31.80      | 32.80      | 21.80  | 42.20       | 33.10  | 15.70       | 29.90      | 32.20      | 29.80      | 33.10      | 29.00      | 25.00  | 32.70      | 32.40      | 35.10      | 31.00  | 34.40  | 32.80      | 33.20       | 41.30       | 35.80      | 41.80      | 35.20      | 29.80       | 33.60       |
| Ce                                                   | 57.30      | 81.80  | 57.00  | 53.50      | 63.00  | 51.60      | 61.50      | 63.90      | 39.10  | 81.20       | 63.00  | 27.80       | 56.70      | 62.60      | 57.20      | 63.80      | 55.40      | 46.20  | 64.40      | 63.30      | 66.50      | 60.90  | 64.50  | 63.90      | 61.90       | 72.20       | 70.30      | 66.60      | 63.40      | 58.30       | 64.60       |
| Pr                                                   | 6.85       | 9.74   | 6.92   | 6.47       | 7.87   | 6.17       | 7.34       | 7.79       | 5.42   | 9.72        | 7.80   | 3.55        | 7.08       | 7.61       | 7.06       | 7.72       | 6.82       | 5.63   | 7.88       | 7.63       | 8.24       | 7.36   | 7.92   | 7.85       | 7.71        | 9.88        | 8.56       | 9.55       | 8.31       | 7.21        | 8.00        |
| Nd                                                   | 25.00      | 35.60  | 25.40  | 23.60      | 29.00  | 22.50      | 27.10      | 29.00      | 19.90  | 35.10       | 28.40  | 13.20       | 26.10      | 27.90      | 26.00      | 28.20      | 25.10      | 20.90  | 29.20      | 28.20      | 30.30      | 27.10  | 29.00  | 28.80      | 28.30       | 36.10       | 31.30      | 36.60      | 30.40      | 27.00       | 29.30       |
| Sm                                                   | 4.66       | 6.79   | 4.89   | 4.50       | 5.60   | 4.33       | 5.29       | 5.52       | 4.15   | 6.72        | 5.54   | 2.53        | 5.03       | 5.48       | 5.04       | 5.41       | 4.82       | 3.94   | 5.78       | 5.45       | 5.91       | 5.15   | 5.57   | 5.56       | 5.43        | 6.76        | 5.98       | 7.13       | 5.88       | 5.32        | 5.72        |
| Eu                                                   | 0.95       | 1.37   | 0.97   | 0.93       | 1.13   | 1.12       | 1.10       | 2.26       | 1.00   | 1.78        | 1.16   | 0.82        | 1.08       | 1.08       | 1.10       | 1.10       | 0.97       | 0.86   | 1.18       | 1.11       | 1.20       | 1.08   | 1.14   | 1.12       | 1.82        | 1.66        | 1.17       | 1.48       | 1.30       | 1.54        | 2.58        |
| Gd                                                   | 4.06       | 6.27   | 4.21   | 3.96       | 4.88   | 4.03       | 4.66       | 5.49       | 3.52   | 5.89        | 4.86   | 2.46        | 4.46       | 4.63       | 4.44       | 4.72       | 4.16       | 3.60   | 4.94       | 4.72       | 5.02       | 4.41   | 4.93   | 4.85       | 5.19        | 5.65        | 5.30       | 6.55       | 5.26       | 4.98        | 5.94        |
| Tb                                                   | 0.66       | 1.05   | 0.70   | 0.66       | 0.81   | 0.63       | 0.80       | 0.80       | 0.63   | 0.96        | 0.80   | 0.38        | 0.74       | 0.79       | 0.74       | 0.78       | 0.69       | 0.62   | 0.84       | 0.78       | 0.85       | 0.74   | 0.83   | 0.80       | 0.77        | 0.88        | 0.83       | 1.13       | 0.85       | 0.82        | 0.82        |
| Dy                                                   | 3.81       | 5.91   | 4.05   | 3.81       | 4.62   | 3.65       | 4.53       | 4.60       | 3.70   | 5.54        | 4.58   | 2.21        | 4.16       | 4.45       | 4.16       | 4.42       | 3.95       | 3.51   | 4.80       | 4.56       | 4.88       | 4.21   | 4.75   | 4.66       | 4.32        | 4.81        | 4.78       | 6.46       | 4.72       | 4.71        | 4.63        |
| Ho                                                   | 0.74       | 1.14   | 0.79   | 0.73       | 0.89   | 0.70       | 0.89       | 0.90       | 0.74   | 1.10        | 0.90   | 0.43        | 0.81       | 0.88       | 0.82       | 0.88       | 0.77       | 0.71   | 0.94       | 0.91       | 0.96       | 0.83   | 0.93   | 0.90       | 0.83        | 0.90        | 0.92       | 1.27       | 0.93       | 0.93        | 0.90        |
| Er                                                   | 2.16       | 3.16   | 2.28   | 2.08       | 2.58   | 1.97       | 2.53       | 2.61       | 2.06   | 3.17        | 2.64   | 1.20        | 2.37       | 2.49       | 2.36       | 2.44       | 2.25       | 2.02   | 2.70       | 2.55       | 2.70       | 2.40   | 2.65   | 2.59       | 2.40        | 2.51        | 2.66       | 3.63       | 2.60       | 2.72        | 2.62        |
| Tm                                                   | 0.33       | 0.46   | 0.34   | 0.32       | 0.40   | 0.30       | 0.40       | 0.40       | 0.32   | 0.48        | 0.40   | 0.19        | 0.37       | 0.37       | 0.36       | 0.37       | 0.34       | 0.32   | 0.42       | 0.39       | 0.42       | 0.36   | 0.40   | 0.40       | 0.37        | 0.39        | 0.41       | 0.55       | 0.40       | 0.42        | 0.40        |
| Yb                                                   | 2.26       | 3.22   | 2.38   | 2.19       | 2.76   | 2.12       | 2.70       | 2.73       | 2.23   | 3.27        | 2.72   | 1.35        | 2.42       | 2.56       | 2.52       | 2.61       | 2.36       | 2.15   | 2.87       | 2.73       | 2.91       | 2.47   | 2.79   | 2.79       | 2.52        | 2.71        | 2.87       | 3.68       | 2.67       | 2.82        | 2.73        |
| Lu                                                   | 0.36       | 0.49   | 0.37   | 0.34       | 0.44   | 0.34       | 0.45       | 0.44       | 0.35   | 0.53        | 0.44   | 0.21        | 0.40       | 0.41       | 0.39       | 0.42       | 0.38       | 0.35   | 0.45       | 0.44       | 0.46       | 0.40   | 0.44   | 0.44       | 0.42        | 0.42        | 0.45       | 0.58       | 0.42       | 0.44        | 0.44        |
| ΣREE                                                 | 138.9<br>4 | 201.60 | 140.10 | 131.2<br>9 | 157.38 | 126.7<br>6 | 151.0<br>9 | 159.2<br>4 | 104.92 | 197.66      | 156.34 | 72.03       | 141.6<br>2 | 153.4<br>5 | 141.9<br>9 | 155.9<br>7 | 137.0<br>1 | 115.81 | 159.1<br>0 | 155.1<br>7 | 165.4<br>5 | 148.41 | 160.25 | 157.4<br>6 | 155.18      | 186.1<br>7  | 171.3<br>3 | 187.0<br>1 | 162.3<br>4 | 147.0<br>1  | 162.28      |
| Al <sub>2</sub> O <sub>3</sub> /Si<br>O <sub>2</sub> | 0.26       | 0.24   | 0.22   | 0.20       | 0.24   | 0.22       | 0.21       | 0.21       | 0.19   | 0.22        | 0.23   | 0.19        | 0.21       | 0.22       | 0.22       | 0.19       | 0.20       | 0.21   | 0.21       | 0.23       | 0.21       | 0.21   | 0.22   | 0.21       | 0.22        | 0.21        | 0.22       | 0.21       | 0.20       | 0.22        | 0.22        |
| CaOmol                                               | 0.31       | 0.14   | 0.25   | 0.30       | 0.17   | 0.39       | 0.25       | 0.13       | 0.03   | 0.04        | 0.21   | 0.46        | 0.18       | 0.15       | 0.16       | 0.22       | 0.14       | 0.44   | 0.12       | 0.24       | 0.15       | 0.13   | 0.26   | 0.12       | 0.16        | 0.02        | 0.10       | 0.21       | 0.17       | 0.17        | 0.15        |
| Na <sub>2</sub> Omol                                 | 0.03       | 0.03   | 0.03   | 0.03       | 0.04   | 0.03       | 0.03       | 0.04       | 0.06   | 0.05        | 0.03   | 0.03        | 0.04       | 0.04       | 0.04       | 0.04       | 0.03       | 0.04   | 0.04       | 0.03       | 0.04       | 0.04   | 0.03   | 0.04       | 0.04        | 0.04        | 0.04       | 0.03       | 0.03       | 0.03        | 0.04        |
| Al <sub>2</sub> O <sub>3</sub> m                     | 0.11       | 0.13   | 0.11   | 0.10       | 0.13   | 0.09       | 0.11       | 0.12       | 0.13   | 0.13        | 0.12   | 0.08        | 0.12       | 0.12       | 0.11       | 0.11       | 0.11       | 0.07   | 0.12       | 0.10       | 0.13       | 0.12   | 0.11   | 0.13       | 0.12        | 0.14        | 0.13       | 0.10       | 0.11       | 0.11        | 0.12        |

|                                    |       |       |       |       |       |       |       |       |       |       |       |       |       |       |       |       |       |       |       |       |       |       |       |       |       |       |       |       |       |       |       |  |
|------------------------------------|-------|-------|-------|-------|-------|-------|-------|-------|-------|-------|-------|-------|-------|-------|-------|-------|-------|-------|-------|-------|-------|-------|-------|-------|-------|-------|-------|-------|-------|-------|-------|--|
| ol                                 |       |       |       |       |       |       |       |       |       |       |       |       |       |       |       |       |       |       |       |       |       |       |       |       |       |       |       |       |       |       |       |  |
| K <sub>2</sub> Omol                | 0.03  | 0.03  | 0.03  | 0.02  | 0.03  | 0.02  | 0.02  | 0.03  | 0.03  | 0.03  | 0.03  | 0.02  | 0.03  | 0.03  | 0.02  | 0.02  | 0.02  | 0.02  | 0.03  | 0.02  | 0.03  | 0.03  | 0.02  | 0.03  | 0.03  | 0.03  | 0.03  | 0.02  | 0.03  | 0.02  | 0.03  |  |
| CaOcor<br>mol                      | 0.30  | 0.14  | 0.25  | 0.30  | 0.17  | 0.39  | 0.25  | 0.13  | 0.03  | 0.03  | 0.20  | 0.45  | 0.18  | 0.15  | 0.15  | 0.22  | 0.14  | 0.44  | 0.11  | 0.24  | 0.14  | 0.12  | 0.25  | 0.12  | 0.16  | 0.02  | 0.10  | 0.21  | 0.16  | 0.17  | 0.14  |  |
| CaO*<br>mol                        | 0.03  | 0.03  | 0.03  | 0.03  | 0.04  | 0.03  | 0.03  | 0.04  | 0.03  | 0.03  | 0.03  | 0.03  | 0.04  | 0.04  | 0.04  | 0.04  | 0.04  | 0.03  | 0.04  | 0.03  | 0.04  | 0.04  | 0.03  | 0.04  | 0.04  | 0.02  | 0.04  | 0.03  | 0.03  | 0.03  | 0.04  |  |
| CIA                                | 57.82 | 56.76 | 54.58 | 52.66 | 54.98 | 52.08 | 53.57 | 50.76 | 50.50 | 54.33 | 55.47 | 47.55 | 53.10 | 52.85 | 50.52 | 52.75 | 50.34 | 51.65 | 55.43 | 52.67 | 53.26 | 54.55 | 55.59 | 55.60 | 51.80 | 61.92 | 55.26 | 57.44 | 55.40 | 53.43 | 52.12 |  |
| CN mol                             | 0.05  | 0.07  | 0.06  | 0.06  | 0.07  | 0.06  | 0.07  | 0.09  | 0.09  | 0.08  | 0.07  | 0.06  | 0.08  | 0.08  | 0.08  | 0.07  | 0.08  | 0.05  | 0.07  | 0.07  | 0.08  | 0.07  | 0.06  | 0.07  | 0.08  | 0.05  | 0.07  | 0.05  | 0.07  | 0.07  | 0.08  |  |
| CIA <sup>K-corr</sup><br>ected     | 59.17 | 58.30 | 55.56 | 53.49 | 56.13 | 52.50 | 54.04 | 50.86 | 51.46 | 54.99 | 56.14 | 48.19 | 53.43 | 53.08 | 50.41 | 52.89 | 50.34 | 52.15 | 55.98 | 52.90 | 53.51 | 55.13 | 56.28 | 56.50 | 52.10 | 63.69 | 55.94 | 58.49 | 55.94 | 53.79 | 52.20 |  |
| Zr/Sc                              | 10.51 | 11.17 | 14.62 | 14.85 | 13.14 | 14.22 | 13.55 | 18.49 | 27.75 | 16.23 | 14.12 | 13.27 | 16.99 | 15.31 | 14.38 | 12.38 | 17.03 | 16.93 | 16.00 | 16.38 | 14.67 | 17.60 | 15.89 | 16.82 | 19.76 | 16.38 | 18.41 | 11.36 | 15.40 | 16.12 | 14.19 |  |
| Th/Sc                              | 0.95  | 0.82  | 0.88  | 0.83  | 0.81  | 0.77  | 0.73  | 0.85  | 1.18  | 0.98  | 0.79  | 0.74  | 0.80  | 0.78  | 0.76  | 0.68  | 0.79  | 0.79  | 0.81  | 0.75  | 0.75  | 0.82  | 0.77  | 0.86  | 0.92  | 0.77  | 0.96  | 0.61  | 0.74  | 0.70  | 0.77  |  |
| La/Th                              | 2.66  | 3.95  | 2.89  | 3.28  | 2.93  | 3.48  | 3.52  | 3.07  | 2.79  | 2.85  | 3.09  | 3.80  | 3.05  | 3.19  | 3.07  | 3.42  | 3.29  | 3.63  | 2.87  | 3.32  | 3.11  | 3.01  | 3.60  | 2.88  | 2.86  | 3.53  | 2.71  | 4.24  | 3.45  | 3.19  | 3.20  |  |
| Sr/Ba                              | 1.02  | 0.53  | 0.68  | 0.79  | 0.40  | 0.20  | 0.36  | 0.07  | 0.27  | 0.10  | 0.48  | 0.46  | 0.59  | 0.63  | 0.64  | 0.88  | 0.69  | 0.70  | 0.60  | 0.58  | 0.47  | 0.47  | 0.72  | 0.56  | 0.08  | 0.13  | 0.54  | 1.44  | 0.38  | 0.21  | 0.06  |  |
| U/Th                               | 1.59  | 0.30  | 0.23  | 0.51  | 0.19  | 5.87  | 1.22  | 0.30  | 1.01  | 20.88 | 0.56  | 8.45  | 4.95  | 0.59  | 0.23  | 0.39  | 0.21  | 0.59  | 0.16  | 0.16  | 4.75  | 0.17  | 0.18  | 0.16  | 0.65  | 0.61  | 0.21  | 3.60  | 0.26  | 0.24  | 0.97  |  |
| V/Cr                               | 1.29  | 1.29  | 1.16  | 1.15  | 1.38  | 1.23  | 1.40  | 1.19  | 1.44  | 1.12  | 1.26  | 1.13  | 1.24  | 1.27  | 1.19  | 1.20  | 0.93  | 0.95  | 1.18  | 1.22  | 1.14  | 1.17  | 1.07  | 1.37  | 1.33  | 0.83  | 0.77  | 1.67  | 1.33  | 1.27  | 1.37  |  |
| Ni/Co                              | 2.51  | 2.59  | 2.57  | 2.44  | 2.64  | 2.03  | 2.56  | 2.68  | 2.57  | 2.75  | 2.64  | 2.26  | 2.54  | 2.44  | 2.67  | 2.47  | 2.83  | 2.02  | 3.05  | 2.73  | 2.62  | 2.84  | 2.73  | 2.82  | 2.67  | 2.89  | 2.70  | 2.53  | 2.38  | 2.40  | 2.51  |  |
| Fe <sup>2+</sup> /Fe <sup>3+</sup> | 0.72  | 0.41  | 0.67  | 0.85  | 0.76  | 0.57  | 0.41  | 0.79  | 0.70  | 0.55  | 0.76  | 0.64  | 0.65  | 0.95  | 0.72  | 0.90  | 0.66  | 0.41  | 0.46  | 1.71  | 0.72  | 0.59  | 0.57  | 0.38  | 0.61  | 0.40  | 0.56  | 0.93  | 0.87  | 0.78  | 1.06  |  |
| Sr/Cu                              | 18.29 | 7.27  | 13.47 | 19.02 | 7.51  | 14.20 | 10.92 | 10.57 | 18.58 | 8.19  | 11.26 | 54.01 | 14.80 | 10.33 | 15.97 | 17.23 | 12.72 | 10.45 | 11.33 | 13.37 | 9.44  | 8.48  | 12.18 | 9.89  | 10.99 | 6.42  | 8.58  | 24.47 | 11.01 | 13.80 | 9.66  |  |
| FeO/Mn<br>O                        | 19.05 | 25.63 | 21.73 | 16.26 | 25.60 | 5.39  | 11.91 | 32.59 | 29.64 | 30.83 | 22.47 | 6.06  | 23.62 | 29.28 | 22.89 | 10.94 | 18.88 | 1.42  | 19.87 | 18.20 | 26.77 | 23.33 | 6.58  | 20.94 | 19.50 | 31.49 | 26.77 | 11.20 | 25.13 | 19.89 | 25.93 |  |
